# Supplementary material for: Resource heterogeneity leads to unjust effort distribution in climate change mitigation
Source: PLOS journal article supplement (doi:10.1371/journal.pone.0204369), 2018-10-31
Supplement: S7 (10.1371/journal.pone.0204369.s007) [file journal.pone.0204369.s007]

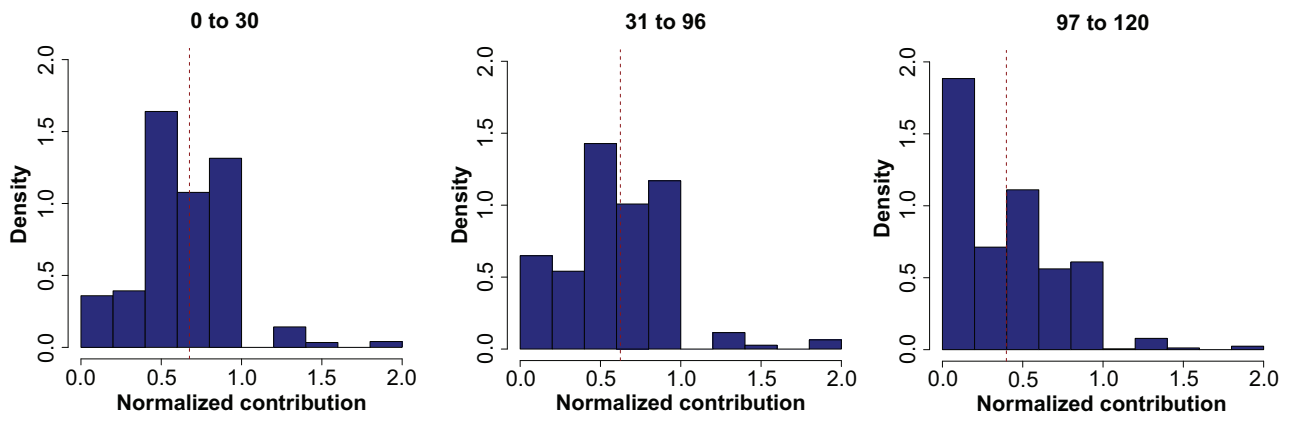

**Fig S7: Distributions of normalized contributions in the three phases of the game.** The mean (SD) in each phase, based on the accumulated capital in the common fund, is: common fund from 0 € to 30 €: 0.67 (0.33), common fund from 31 € to 96 €: 0.62 (0.37), and common fund from 97 € to 120 €: 0.39 (0.38).
