# Supplementary material for: Resource heterogeneity leads to unjust effort distribution in climate change mitigation
Source: PLOS journal article supplement (doi:10.1371/journal.pone.0204369), 2018-10-31
Supplement: S16 (10.1371/journal.pone.0204369.s016) [file journal.pone.0204369.s016]

## Welcome to The climate game

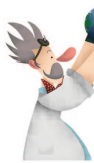

### TUTORIAL: HOW DO YOU PLAY?

This screen will show you how to play the game suggested by Dr. Brain, a game designed to study how we make decisions.

Use the lateral arrows to side-scroll and navigate in the tutorial, once you finish you can start the game.

This game is designed by scientists from the Universitat de Barcelona (UB), Universitat Rovira i Virgili (URV), Instituto de Bioinformática y Sistemas Complejos (IBSC), Universidad de Zaragoza (UZ) and Universidad Carlos III de Madrid (UC3M). It is an experiment to study and understand how human make decisions.

## The rules of The climate game

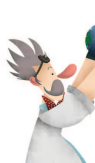

- 1) It is important that you do not talk with the other players during the experiment.
- 2) We do not expect you to behave in any special way; there are no right or wrong answers.
- 3) If you exit the game while the game is running, you can not re-enter!
- 4) The decisions taken during the game will have real consequences in both the money that you get at the end of the game and in the financing of actions against climate change.

In the game you will play with 5 other people to be randomly selected so that no one will know who you are playing with

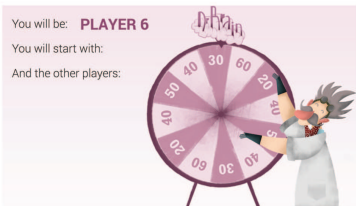

Before the game starts, Dr. Brain will randomly assign you a player number and the amount of money that you will have initially. This initial capital will be from 20 to 60 euros.

Also, you will know the initial capital of the other players!

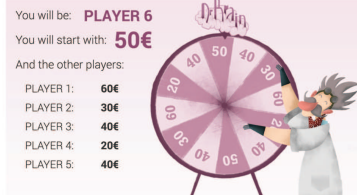

The target of the game is to raise 120 euros in a common fund to finance actions against climate change.

The game will run for 10 rounds. In each round each player has to contribute from 0 to 4 euros of their own capital to the common fund.

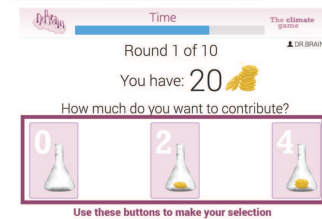

At the end of each round and once the six players have decided, you will see:

- 1) The amount of money that is in the common fund.
- 2) How much has each player contributed in the round.
- 3) The starting and current capital of each player.

| Results Round 1 |                  |                    |                 |
|-----------------|------------------|--------------------|-----------------|
|                 | Starting capital | Contribution round | Current capital |
| PLAYER 1        | 20€              | 2€                 | 18€             |
| PLAYER 2        | 40€              | 2€*                | 38€             |
| PLAYER 3        | 60€              | 2€*                | 58€             |
| PLAYER 4        | 50€              | 2€*                | 48€             |
| PLAYER 5        | 40€              | 2€*                | 38€             |
| PLAYER 6        | 30€              | 2€*                | 28€             |
| TOTAL           | 12€              |                    |                 |

NOTE: The contributions marked with \*, the system has decided by the player

In each round you have 30 seconds to make a decision. If after this time you have not decided, the computer will do it in your place.

Important! If time runs out in two or more rounds you will not get any profit. Stay focused!

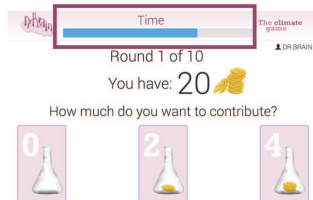

If after 10 rounds THERE ARE 120 EUROS OR MORE in the common fund:

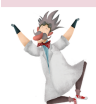

1. The participants will receive a gift card amounting to the value of their savings.
2. We will fund actions against climate change, such as the reforestation of "Parc de Collserola" in Barcelona.

If after 10 rounds THERE ARE LESS THAN 120 EUROS in the common fund:

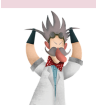

1. There is a 10% possibility that the participants will receive their savings as a gift card.
2. We will not be able to spend money on climate change actions, such as planting trees.

## The climate game

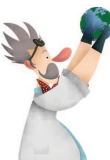

Once you finish the game, you will see a screen with the final result and then we will ask you to fill out a short survey.

Remember, the outcome depends on your decisions and those of the rest of your peers.

If you have any questions you can ask any of the organizers.

Touch the button to continue

**Fig S16: Screenshots of the tutorial shown before the experiment.** Images of the character created by Mensula Studio are licensed under CC BY 4.0.
